# Supplementary material for: Strategy of stacking double absorbers to gain high efficiency in silver antimony sulfide selenide-based thin film solar cell
Source: Royal Society of Chemistry journal article supplement (doi:10.1039/d3tc03794k), 2024-01-01
Supplement: d3tc03794k1.pdf [file d3tc03794k1.pdf]

## SUPPLEMENTARY INFORMATION

### A Strategy of Stacking Double Absorbers to Gain High Efficiency in Silver Antimony Sulfide Selenide Based Thin Film Solar Cell

Haoyang Li<sup>a,b</sup>, Hua Tang<sup>\*a</sup>, Junsheng Yu<sup>\*b</sup>, Jiang Cheng<sup>a</sup>, Lu Li<sup>a</sup>

<sup>a</sup> Chongqing Key Laboratory of Materials Surface & Interface Science, School of Materials Science and Engineering, Chongqing University of Arts and Sciences, Chongqing 402160, PR China.

<sup>b</sup> State Key Laboratory of Electronic Thin Films and Integrated Devices, School of Optoelectronic Science and Engineering, University of Electronic Science and Technology of China (UESTC), Chengdu 610054, PR China.

SEM and EDS results for  $\text{AgSb}(\text{S},\text{Se})_2$  based double absorbers with different combinations.

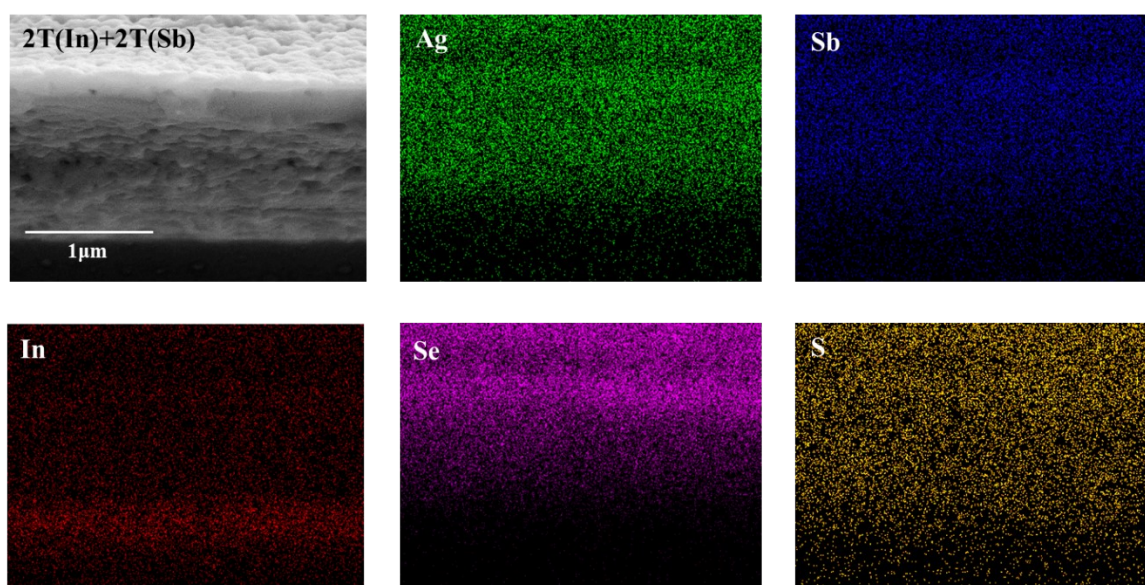

**Figure S1** SEM picture of cross-section and EDS elemental maps for  $2\text{T}(\text{In})+2\text{T}(\text{Sb})$

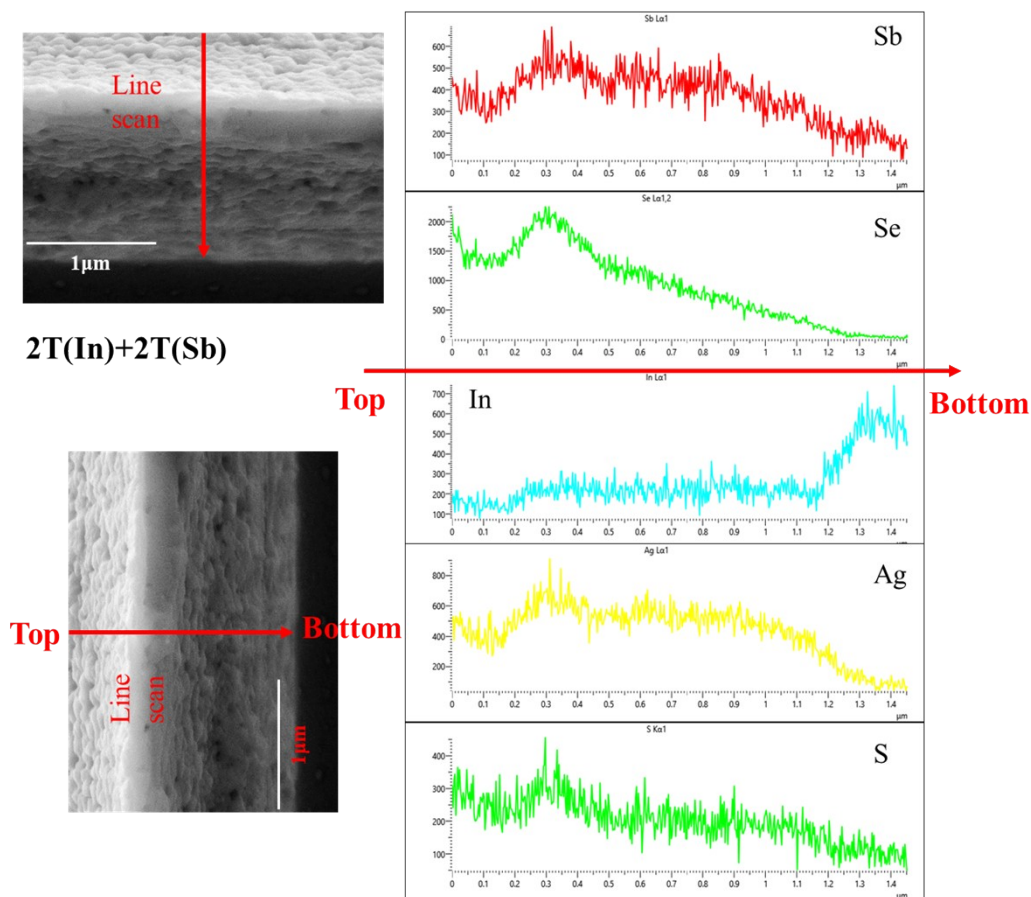

Figure S2 EDS line scan elemental distributions for cross-section of 2T(In)+2T(Sb)

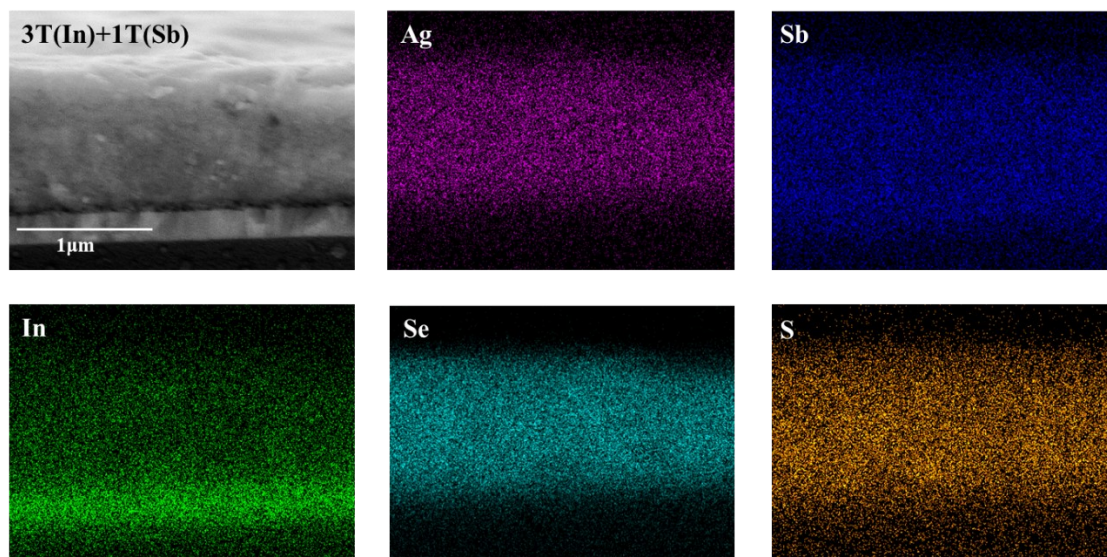

Figure S3 SEM picture of cross-section and EDS elemental maps for 3T(In)+1T(Sb)



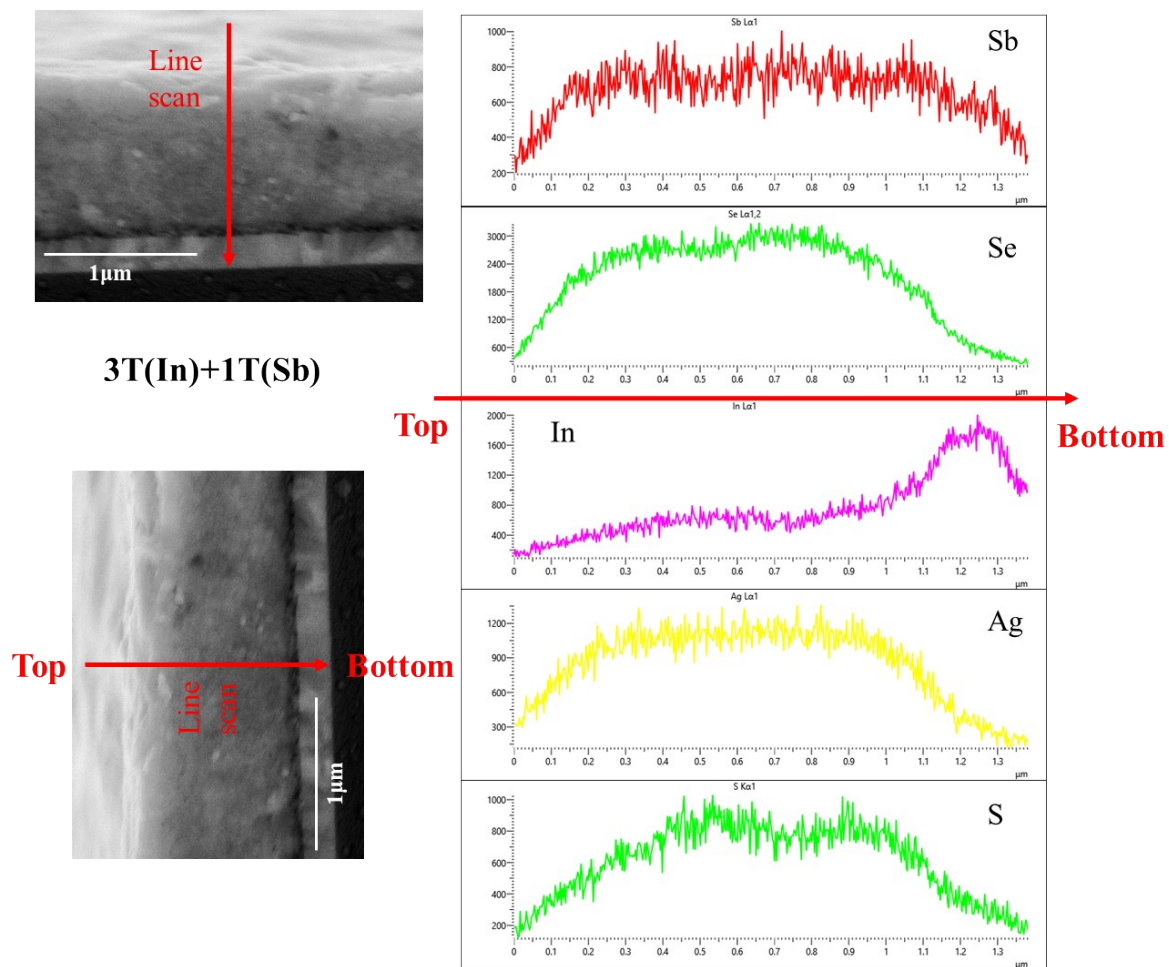

**Figure S4** EDS line scan elemental distributions for cross-section of 3T(In)+1T(Sb)

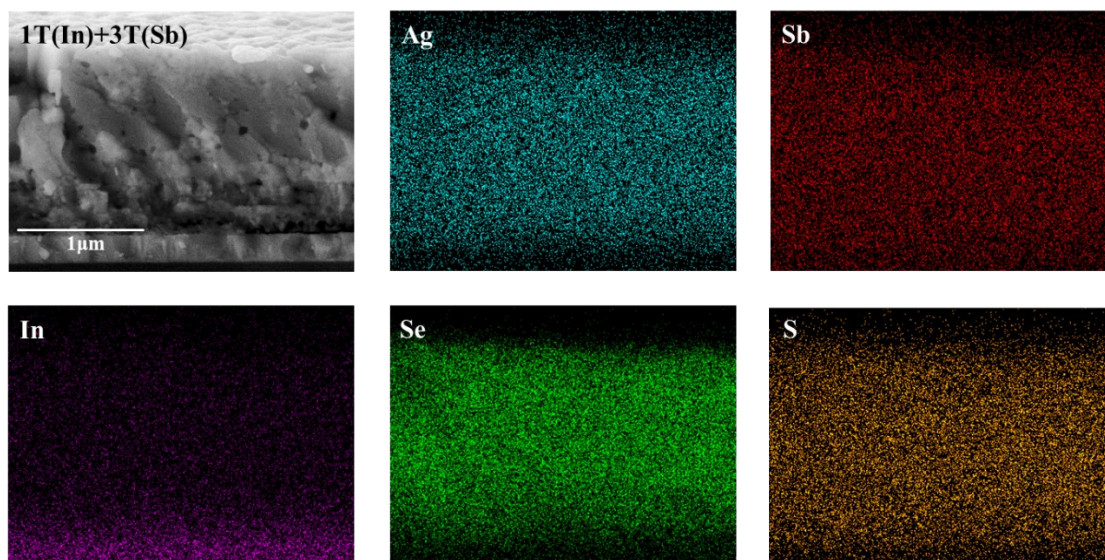

**Figure S5** SEM picture of cross-section and EDS elemental maps for 1T(In)+3T(Sb)

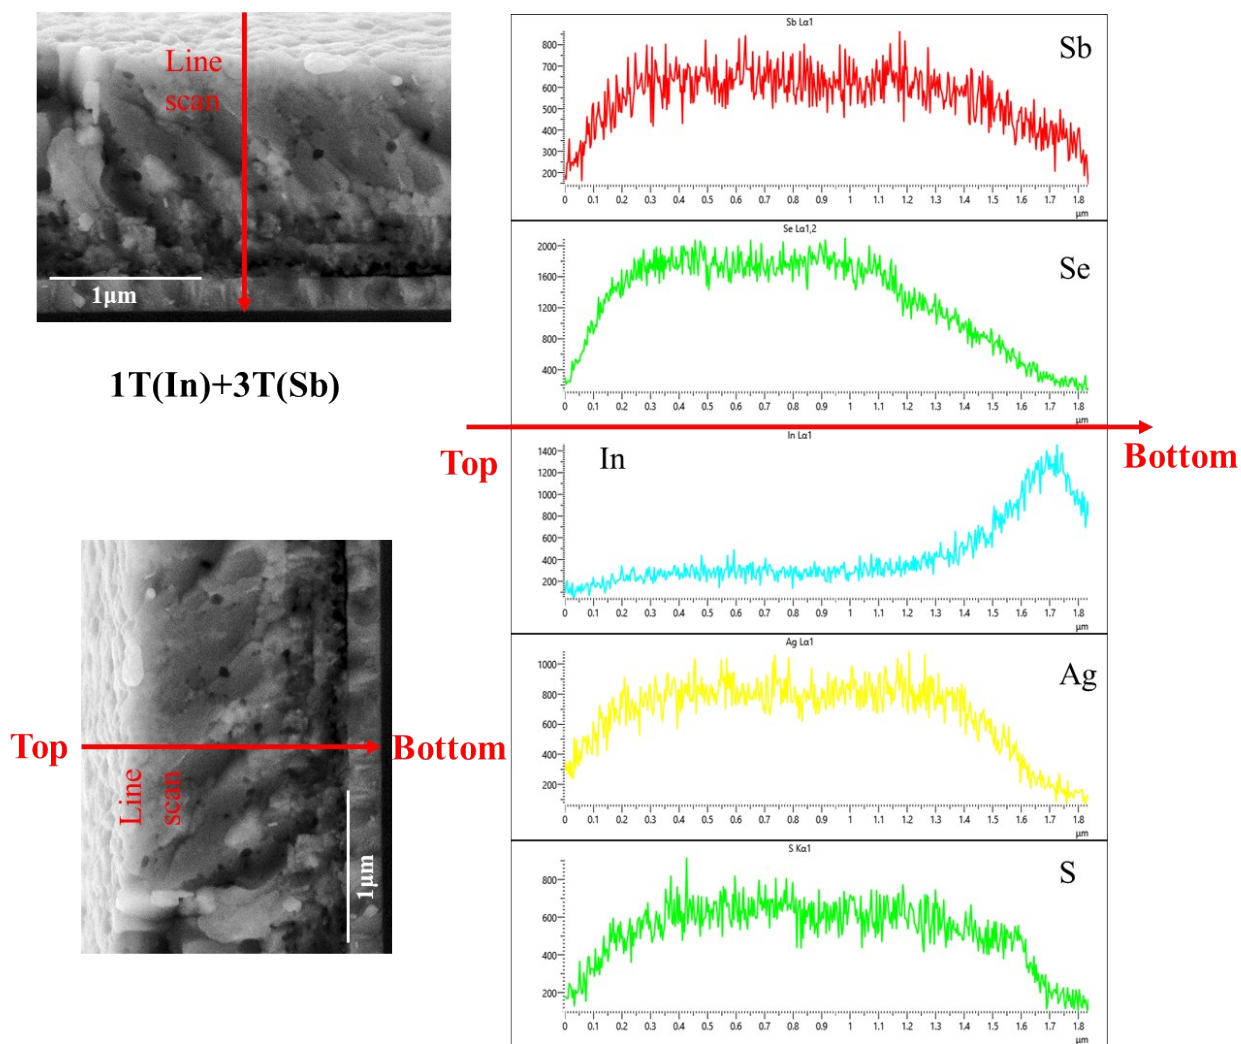

**Figure S6** EDS line scan elemental distributions for cross-section of 1T(In)+3T(Sb)

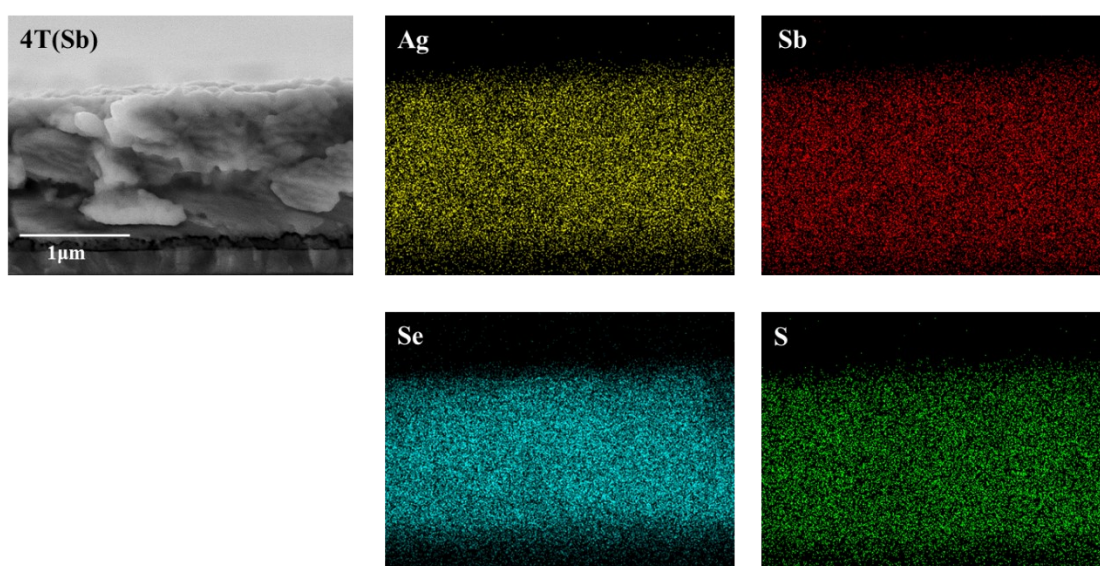

**Figure S7** SEM picture of cross-section and EDS elemental maps for 4T(Sb)



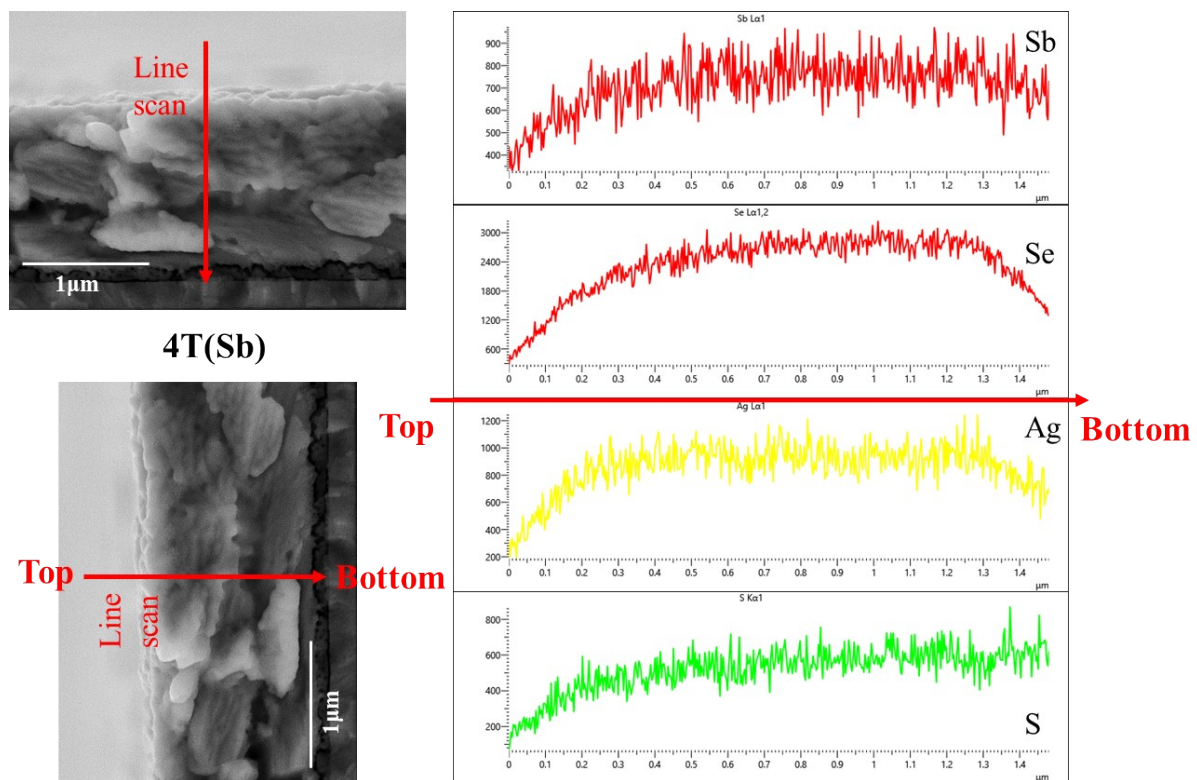

Figure S8 EDS line scan elemental distributions for cross-section of 4T(Sb)

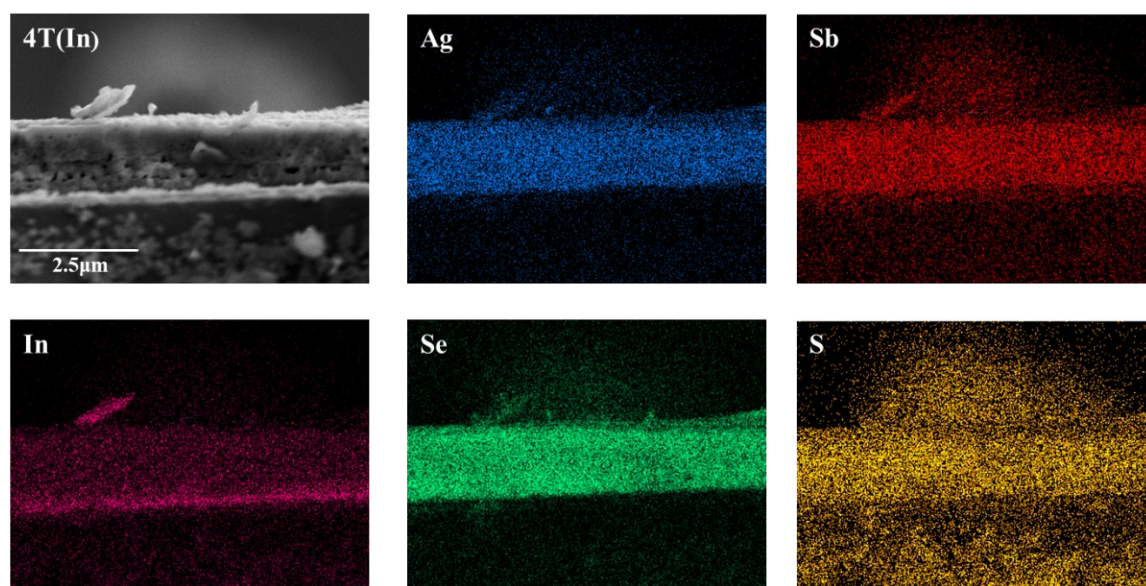

Figure S9 SEM picture of cross-section and EDS elemental maps for 4T(In)

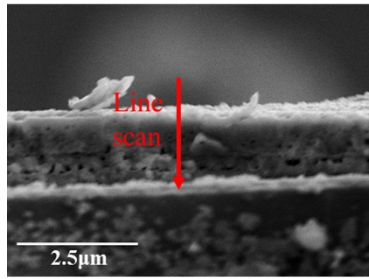

4T(In)

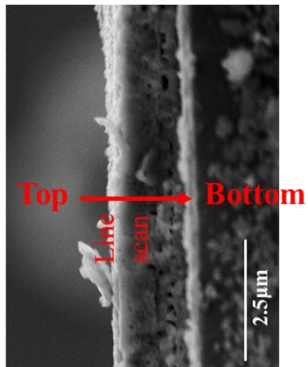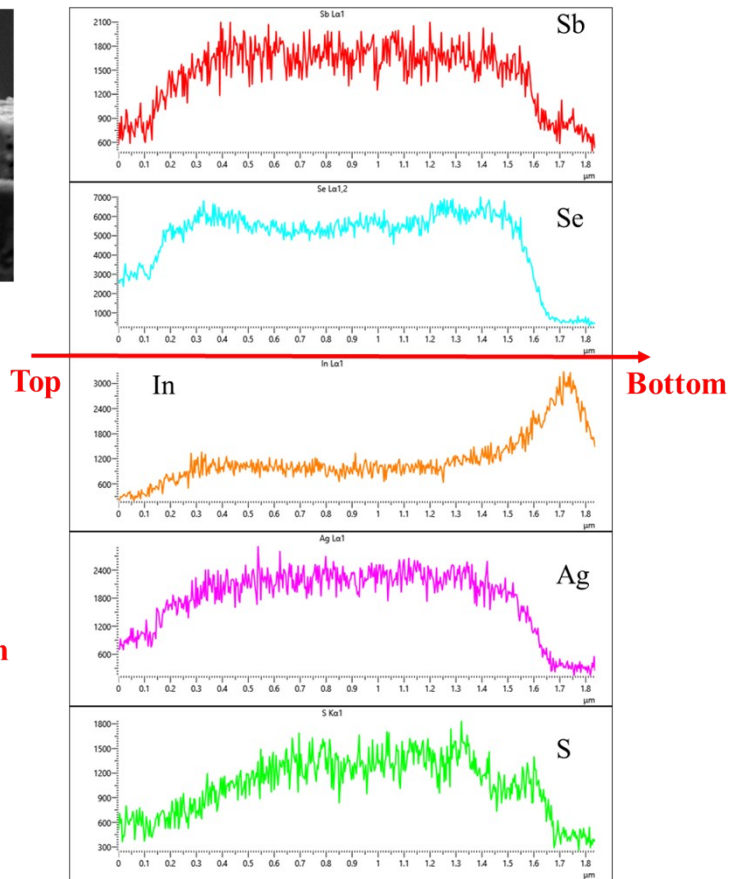

Figure S10 EDS line scan elemental distributions for cross-section of 4T(In)
